# Supplementary material
Source: PubMed Central journal article supplement (PMC4587768)

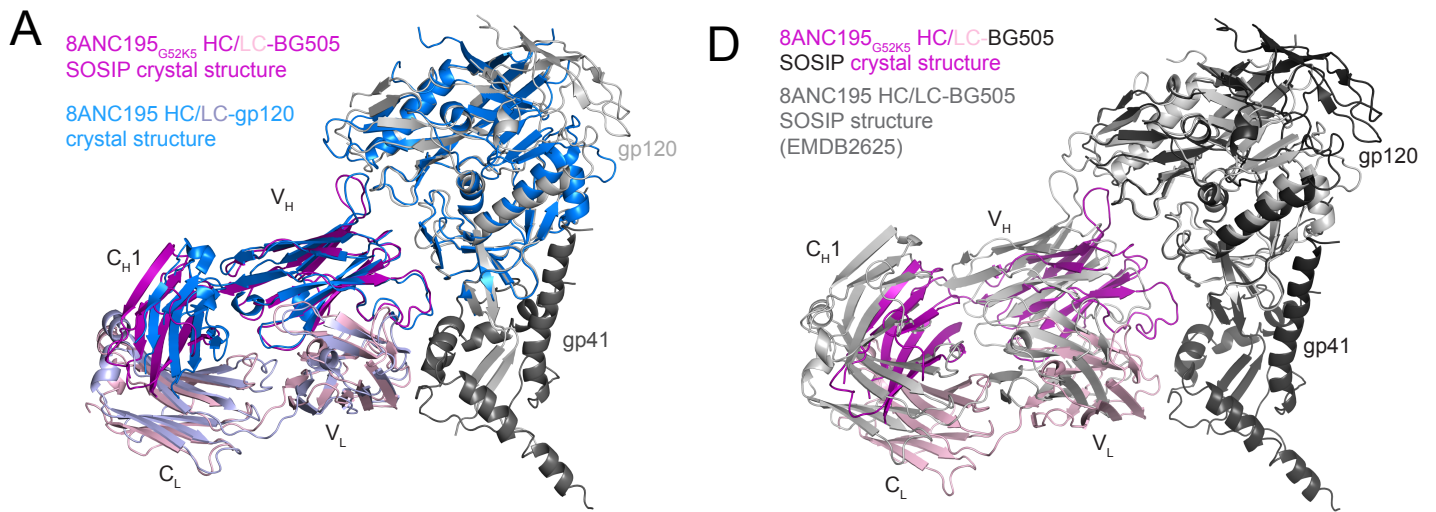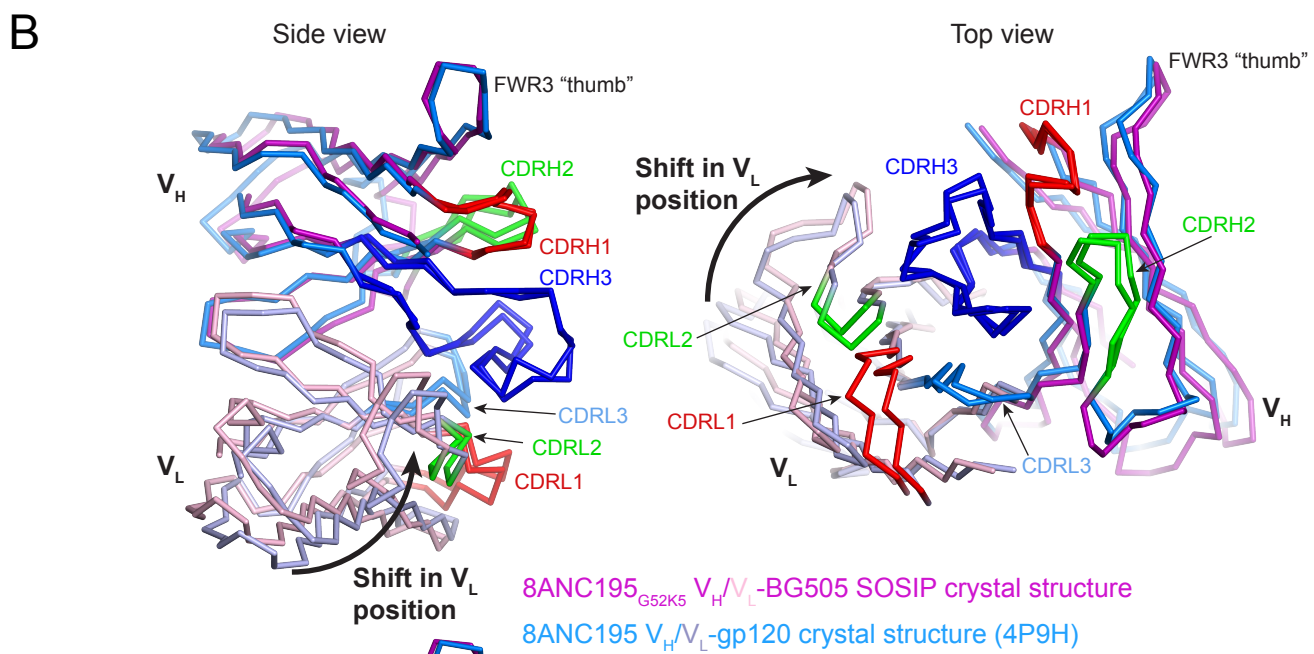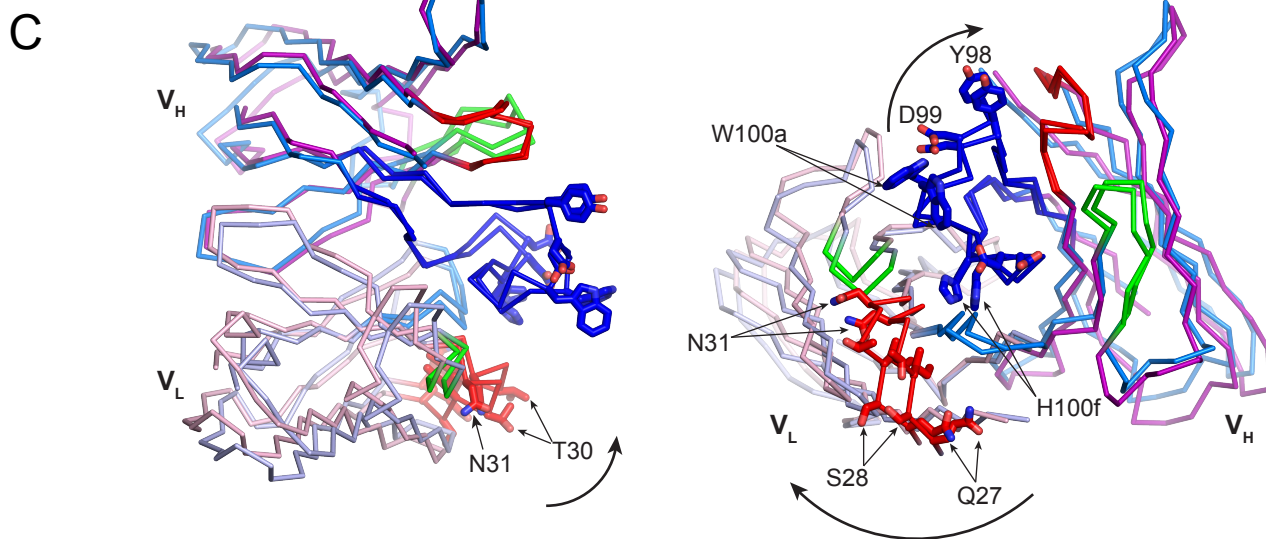

Figure S2, Scharf et al.

Supplement: NIHMS718572-supplement-2.pdf [file NIHMS718572-supplement-2.pdf]

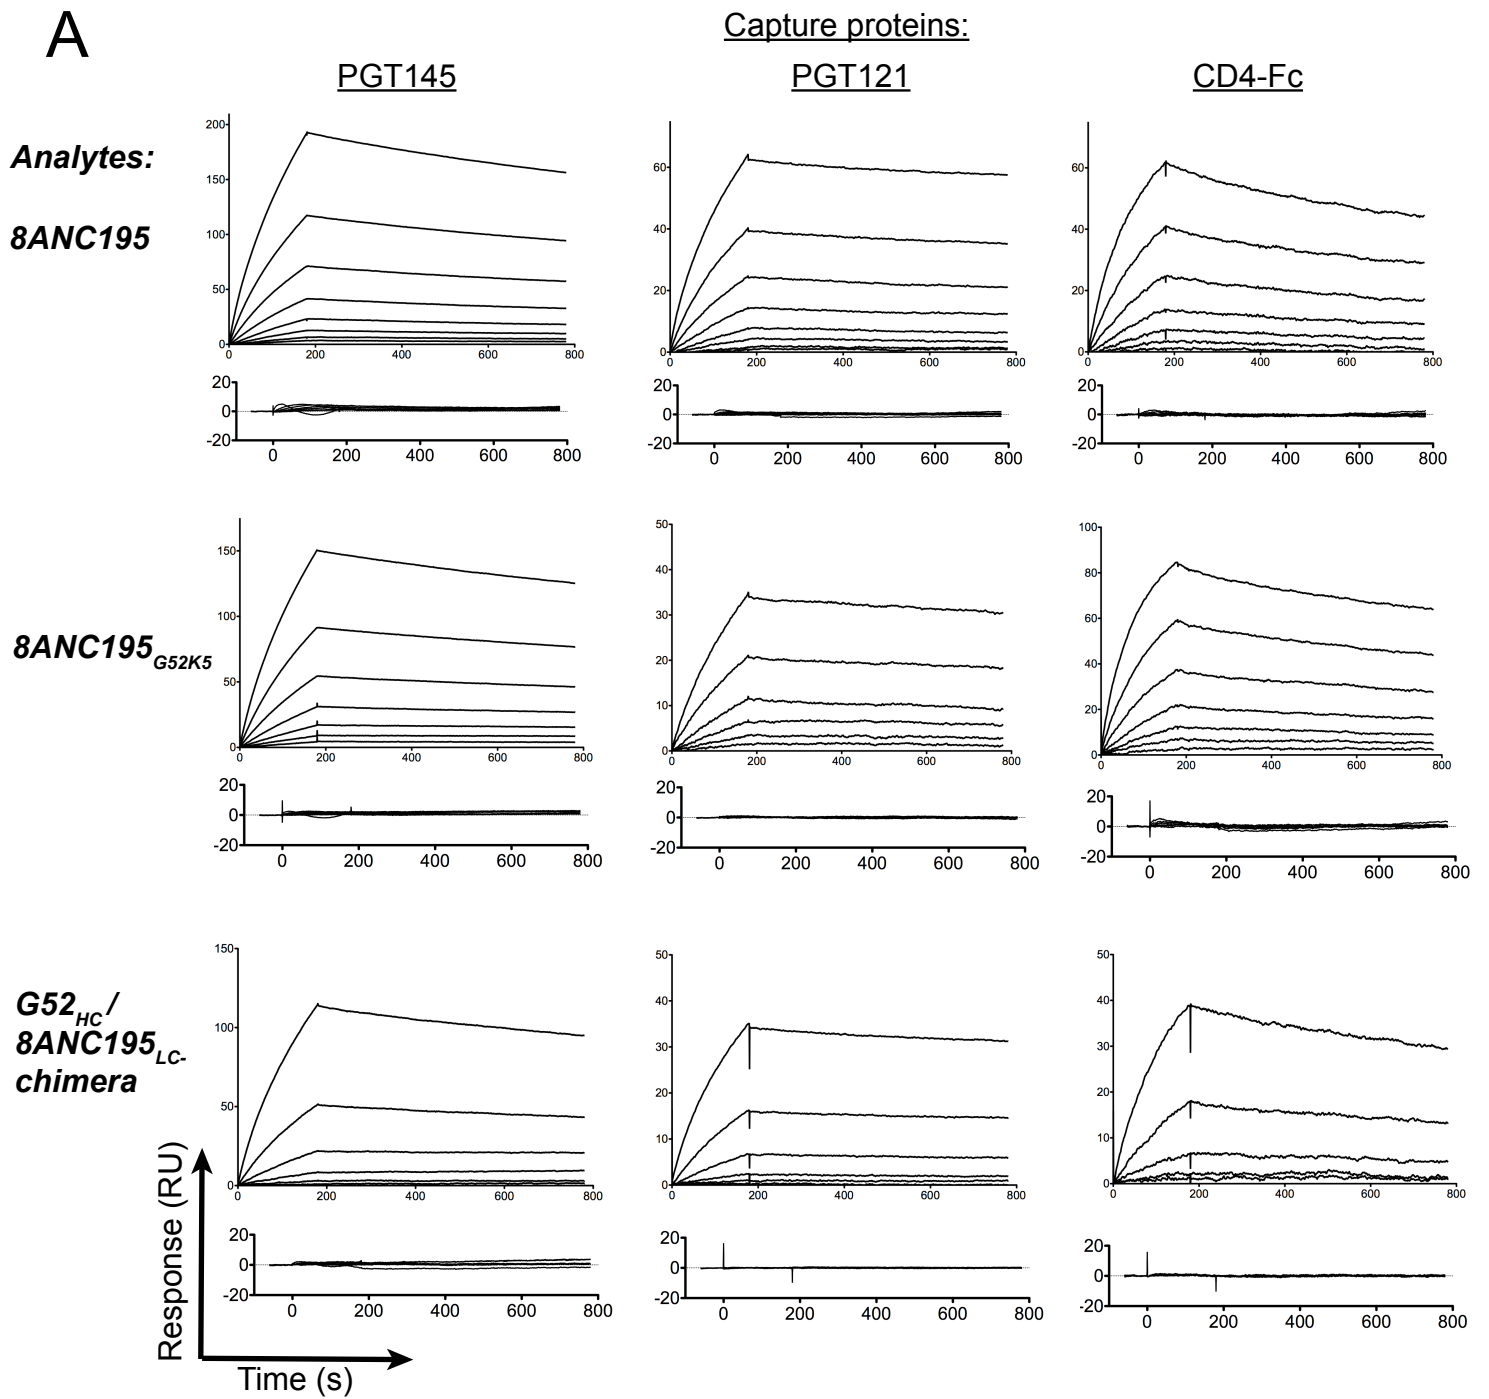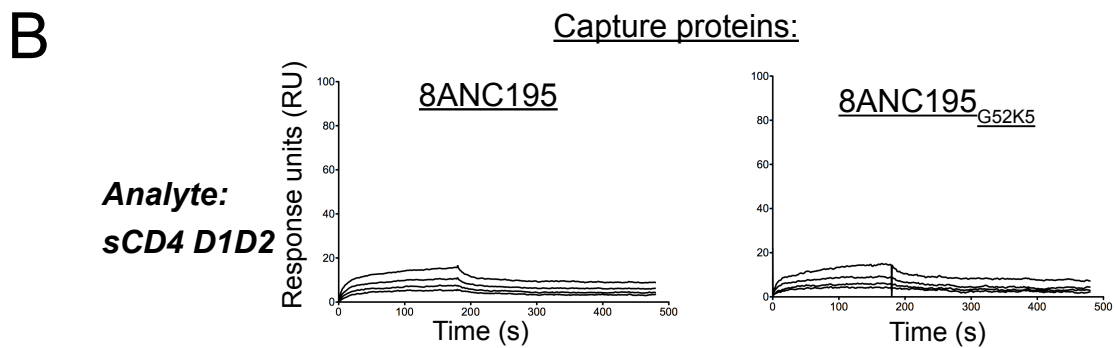

Figure S3, Scharf et al.

Supplement: NIHMS718572-supplement-3.pdf [file NIHMS718572-supplement-3.pdf]
